# Supplementary material for: Modulating the ferroelectric performance by altering halogen anions in the crystals of tetranuclear copper-clusters
Source: Royal Society of Chemistry journal article supplement (doi:10.1039/d1nj01894a), 2021-01-01
Supplement: d1nj01894a1.pdf [file d1nj01894a1.pdf]

## Electronic supplementary information for *New Journal of Chemistry*

### Modulating the Ferroelectric Performance by Altering Halogen Anions in Crystals of Tetranuclear Copper–Clusters

Meiyong Liu, Jingjing Liang and Zhiliang Liu \*

Inner Mongolia Key Laboratory of Chemistry and Physics of Rare Earth Materials, School of Chemistry and Chemical Engineering, Inner Mongolia University, Hohhot 010021, China. \*Corresponding author.

Fax/ Tel: +86–471–4992261

E–mail addresses: cezliu@imu.edu.cn (Z. L. Liu)

### Contents

Table S1 Crystal data and structure refinement of complex **1** and **3**.

Table S2 Main bond lengths [Å] and angles [°] for complex **1** and **3**.

Table S3 Partial hydrogen bond data for complex **1** and **3**.

Fig. S1 The FT–IR spectra of complex **1–4**.

Fig. S2 [Cu<sub>4</sub>O<sub>4</sub>] boated–shape structure.

Fig. S3 The ORTEP of complex **1**

Fig. S4 The coordination mode of ligand L<sup>2–</sup>.

Fig. S5 A chain structure of complex **1** in the direction of *a* axis.

Fig. S6 The ORTEP of complex **3**

Fig. S7 A zig–zag chain structure of complex **3** in the direction of *a* axis.

Fig. S8 The simulation and PXRD patterns for complex **1–4**.

Fig. S9 (a) TGA curves of complex **1** and **2**, (b) TGA curves complex **3** and **4**.

Fig. S10 Dielectric constant of complex **1** (a) and **3** (b) under different frequency in the temperature of 30–240°C.

Fig. S11 DSC curves of complex **1** (a) and **3** (b).

Fig. S12 Leakage curves of complex **1** (a) and **3** (b).

Table S1 Crystallographic data and structure refinement for complex **1** and complex **3**.

| Name                                    | Complex <b>1</b>                                                                               | Complex <b>3</b>                                                                                     |
|-----------------------------------------|------------------------------------------------------------------------------------------------|------------------------------------------------------------------------------------------------------|
| Empirical formula                       | C <sub>70</sub> H <sub>76</sub> Cl <sub>2</sub> Cu <sub>4</sub> N <sub>4</sub> O <sub>14</sub> | C <sub>68.71</sub> H <sub>75.43</sub> Br <sub>2</sub> Cu <sub>4</sub> N <sub>4</sub> O <sub>14</sub> |
| Formula weight                          | 1522.40                                                                                        | 1595.25                                                                                              |
| Temperature/K                           | 293.15                                                                                         | 273.15                                                                                               |
| Wavelength/Å                            | 0.71073                                                                                        | 0.71073                                                                                              |
| Crystal system                          | Monoclinic                                                                                     | Monoclinic                                                                                           |
| space group                             | <i>P2<sub>1</sub></i>                                                                          | <i>P2<sub>1</sub></i>                                                                                |
| a/Å                                     | 10.4998(19)                                                                                    | 10.2904(5)                                                                                           |
| b/Å                                     | 25.108(5)                                                                                      | 21.3262(9)                                                                                           |
| c/Å                                     | 15.766(3)                                                                                      | 15.8441(7)                                                                                           |
| α/°                                     | 90                                                                                             | 90                                                                                                   |
| β/°                                     | 109.173(5)                                                                                     | 93.987(2)                                                                                            |
| γ/°                                     | 90                                                                                             | 90                                                                                                   |
| Volume/Å <sup>3</sup>                   | 3925.8(13)                                                                                     | 3468.7(3)                                                                                            |
| Z                                       | 2                                                                                              | 2                                                                                                    |
| ρ <sub>calc</sub> /mg/cm <sup>3</sup>   | 1.288                                                                                          | 1.527                                                                                                |
| Absorption coefficient/mm <sup>-1</sup> | 1.195                                                                                          | 2.427                                                                                                |
| F(000)                                  | 1572                                                                                           | 1627                                                                                                 |
| Crystal size/ mm <sup>3</sup>           | 0.06 × 0.05 × 0.03                                                                             | 0.09 × 0.08 × 0.06                                                                                   |
| Theta range for data collection/°       | 2.736 to 25.200                                                                                | 2.75 to 25.50                                                                                        |
|                                         | -12 ≤ h ≤ 12                                                                                   | -12 ≤ h ≤ 12                                                                                         |
| Index ranges                            | -30 ≤ k ≤ 30                                                                                   | -25 ≤ k ≤ 25                                                                                         |
|                                         | -18 ≤ l ≤ 18                                                                                   | -19 ≤ l ≤ 19                                                                                         |
| Reflections collected                   | 88529                                                                                          | 86122                                                                                                |
| Independent reflections                 | 13976 [R(int) = 0.0848]                                                                        | 12882 [R(int) = 0.0335]                                                                              |
| Completeness to theta                   | 99.4                                                                                           | 99.8%                                                                                                |
| Absorption correction                   | Semi-empirical from equivalents                                                                | Semi-empirical from equivalents                                                                      |
| Max. and min. transmission              | 0.7457 and 0.4291                                                                              | 0.7454 and 0.6234                                                                                    |
| Refinement method                       | Full-matrix least-squares on F <sup>2</sup>                                                    | Full-matrix least-squares on F <sup>2</sup>                                                          |
| Data/restraints /parameters             | 13976 / 565 / 832                                                                              | 12882 / 16 / 881                                                                                     |
| Goodness-of-fit on F <sup>2</sup>       | 1.067                                                                                          | 1.071                                                                                                |
| Final R indices [I > 2σ(I)]             | R <sub>1</sub> = 0.1099, wR <sub>2</sub> = 0.2856                                              | R <sub>1</sub> = 0.0307, wR <sub>2</sub> = 0.0681                                                    |
| R indices (all data)                    | R <sub>1</sub> = 0.1177, wR <sub>2</sub> = 0.2966                                              | R <sub>1</sub> = 0.0408, wR <sub>2</sub> = 0.0723                                                    |
| Absolute structure parameter            | 0.250(9)                                                                                       | 0.010(3)                                                                                             |

---

Largest diff. peak/hole / e Å<sup>-3</sup>      2.320 and -1.634      0.37 and -0.24

---

Table S2 Main bond lengths (Å) and angles (°) for complex **1** and complex **3**.

---

| Bond lengths (Å) |           |                  |          |
|------------------|-----------|------------------|----------|
| Complex <b>1</b> |           | Complex <b>3</b> |          |
| Cu(1)–N(1)       | 1.90(2)   | Cu(1)–N(4)       | 1.936(4) |
| Cu(1)–O(2)       | 1.956(14) | Cu(1)–O(6)       | 1.937(3) |
| Cu(1)–O(3)       | 1.987(18) | Cu(1)–O(8)       | 1.927(3) |
| Cu(1)–O(9)       | 1.935(17) | Cu(1)–O(9)       | 2.022(4) |
| Cu(1)–O(13)      | 2.260(19) | Cu(1)–O(14)      | 2.294(4) |
| Cu(2)–N(2)       | 1.913(18) | Cu(2)–N(3)       | 1.952(4) |
| Cu(2)–O(1)       | 2.400(18) | Cu(2)–O(8)       | 2.001(3) |
| Cu(2)–O(2)       | 1.942(13) | Cu(2)–O(11)      | 1.921(3) |
| Cu(2)–O(5)       | 1.920(15) | Cu(2)–O(12)      | 1.978(3) |
| Cu(2)–O(6)       | 2.011(17) | Cu(3)–N(2)       | 1.944(4) |
| Cu(3)–N(3)       | 1.910(18) | Cu(3)–O(1)       | 2.369(4) |
| Cu(3)–O(8)       | 1.954(14) | Cu(3)–O(2)       | 2.011(3) |
| Cu(3)–O(9)       | 2.014(17) | Cu(3)–O(5)       | 1.907(3) |
| Cu(3)–O(11)      | 1.993(15) | Cu(3)–O(6)       | 1.966(3) |
| Cu(4)–N(4)       | 1.82(3)   | Cu(4)–N(1)       | 1.951(4) |
| Cu(4)–O(6)       | 1.907(16) | Cu(4)–O(2)       | 1.938(3) |
| Cu(4)–O(11)      | 1.922(15) | Cu(4)–O(3)       | 1.996(4) |
| Cu(4)–O(12)      | 1.989(19) | Cu(4)–O(12)      | 1.942(3) |
| Cu(4)–O(14)      | 2.248(18) | Cu(4)–O(13A)     | 2.34(5)  |
|                  |           | Cu(4)–O(13B)     | 2.28(2)  |

---

| Bond angles (°)  |          |                  |            |
|------------------|----------|------------------|------------|
| Complex <b>1</b> |          | Complex <b>3</b> |            |
| N(1)–Cu(1)–O(2)  | 94.2(8)  | N(4)–Cu(1)–O(8)  | 92.34(15)  |
| N(1)–Cu(1)–O(3)  | 82.0(9)  | N(4)–Cu(1)–O(6)  | 164.41(14) |
| N(1)–Cu(1)–O(9)  | 163.1(7) | N(4)–Cu(1)–O(9)  | 82.85 (16) |
| N(1)–Cu(1)–O(13) | 103.0(7) | N(4)–Cu(1)–O(14) | 98.19 (15) |
| O(2)–Cu(1)–O(3)  | 176.2(7) | O(6)–Cu(1)–O(9)  | 97.13 (14) |
| O(2)–Cu(1)–O(13) | 90.2(6)  | O(6)–Cu(1)–O(14) | 97.39(14)  |
| O(3)–Cu(1)–O(13) | 90.2(8)  | O(8)–Cu(1)–O(6)  | 86.89(14)  |
| O(9)–Cu(1)–O(13) | 94.0(7)  | O(8)–Cu(1)–O(9)  | 174.70(14) |

|                   |           |                    |             |
|-------------------|-----------|--------------------|-------------|
| O(9)–Cu(1)–O(2)   | 85.0(6)   | O(8)–Cu(1)–O(14)   | 91.33(16)   |
| O(9)–Cu(1)–O(3)   | 98.7(7)   | O(9)–Cu(1)–O(14)   | 91.57(16)   |
| N(2)–Cu(2)–O(1)   | 100.5(7)  | N(3)–Cu(2)–O(8)    | 174.24 (16) |
| N(2)–Cu(2)–O(2)   | 171.4(7)  | N(3)–Cu(2)–O(11)   | 92.34 (16)  |
| N(2)–Cu(2)–O(5)   | 93.1(7)   | N(3)–Cu(2)–O(12)   | 85.22(15)   |
| N(2)–Cu(2)–O(6)   | 85.6(7)   | O(11)–Cu(2)–O(8)   | 91.37 (14)  |
| O(2)–Cu(2)–O(6)   | 88.7(6)   | O(11)–Cu(2)–O(12)  | 173.67(16)  |
| O(2)–Cu(2)–O(1)   | 73.3(6)   | O(12)–Cu(2)–O(8)   | 91.54(14)   |
| O(5)–Cu(2)–O(1)   | 93.6(7)   | N(2)–Cu(3)–O(1)    | 101.11(16)  |
| O(5)–Cu(2)–O(2)   | 93.3(6)   | N(2)–Cu(3)–O(2)    | 172.74 (16) |
| O(5)–Cu(2)–O(6)   | 172.8(7)  | N(2)–Cu(3)–O(5)    | 93.30(15)   |
| O(6)–Cu(2)–O(1)   | 93.6(7)   | N(2)–Cu(3)–O(6)    | 84.97(14)   |
| N(3)–Cu(3)–O(8)   | 94.2(7)   | O(2)–Cu(3)–O(1)    | 72.63(13)   |
| N(3)–Cu(3)–O(9)   | 84.4(7)   | O(5)–Cu(3)–O(1)    | 96.93(15)   |
| N(3)–Cu(3)–O(11)  | 172.5(7)  | O(5)–Cu(3)–O(2)    | 91.14(14)   |
| O(8)–Cu(3)–O(9)   | 172.9(7)  | O(5)–Cu(3)–O(6)    | 173.71(15)  |
| O(8)–Cu(3)–O(11)  | 91.3(6)   | O(6)–Cu(3)–O(1)    | 89.34 (13)  |
| O(11)–Cu(3)–O(9)  | 90.8(6)   | O(6)–Cu(3)–O(2)    | 91.21(13)   |
| N(4)–Cu(4)–O(6)   | 160.6(10) | N(1)–Cu(4)–O(2)    | 91.68(17)   |
| N(4)–Cu(4)–O(11)  | 92.3(8)   | N(1)–Cu(4)–O(3)    | 82.35(19)   |
| N(4)–Cu(4)–O(12)  | 83.1(9)   | N(1)–Cu(4)–O(12)   | 167.20(15)  |
| N(4)–Cu(4)–O(14)  | 103.0(9)  | N(1)–Cu(4)–O(13A)  | 100.7(10)   |
| O(6)–Cu(4)–O(11)  | 85.1(7)   | N(1)–Cu(4)–O(13B)  | 95.3(5)     |
| O(6)–Cu(4)–O(12)  | 98.7(8)   | O(2)–Cu(4)–O(3)    | 171.46(16)  |
| O(6)–Cu(4)–O(14)  | 96.2(7)   | O(2)–Cu(4)–O(12)   | 86.43(14)   |
| O(11)–Cu(4)–O(12) | 175.1(8)  | O(2)–Cu(4)–O(13A)  | 92.9(10)    |
| O(11)–Cu(4)–O(14) | 88.2(6)   | O(2)–Cu(4)–O(13B)  | 94.7(6)     |
| O(12)–Cu(4)–O(14) | 94.5(8)   | O(3)–Cu(4)–O(13A)  | 94.2(9)     |
|                   |           | O(3)–Cu(4)–O(13B)  | 91.9(6)     |
|                   |           | O(12)–Cu(4)–O(3)   | 98.03(17)   |
|                   |           | O(12)–Cu(4)–O(13A) | 92.0(10)    |
|                   |           | O(12)–Cu(4)–O(13B) | 97.5(5)     |

Table 3.3 Partial hydrogen bond data for complex **1** and complex **3**.

| Complex <b>1</b> |   |        |         |      |         |
|------------------|---|--------|---------|------|---------|
| D                | A | d(D–H) | d(H..A) | <DHA | d(D..A) |

|                  |     |       |       |        |       |
|------------------|-----|-------|-------|--------|-------|
| C8               | Cl2 | 0.930 | 2.896 | 126.53 | 3.530 |
| C59              | Cl2 | 0.929 | 2.963 | 121.62 | 3.541 |
| C60              | Cl1 | 0.979 | 2.822 | 169.16 | 3.789 |
| <b>Complex 3</b> |     |       |       |        |       |
| O3               | Br4 | 0.863 | 2.139 | 166.58 | 2.985 |
| C49              | Br4 | 0.969 | 2.718 | 162.81 | 3.656 |
| O14              | Br2 | 0.911 | 2.675 | 148.06 | 3.481 |

D: Donor, A: Acceptor

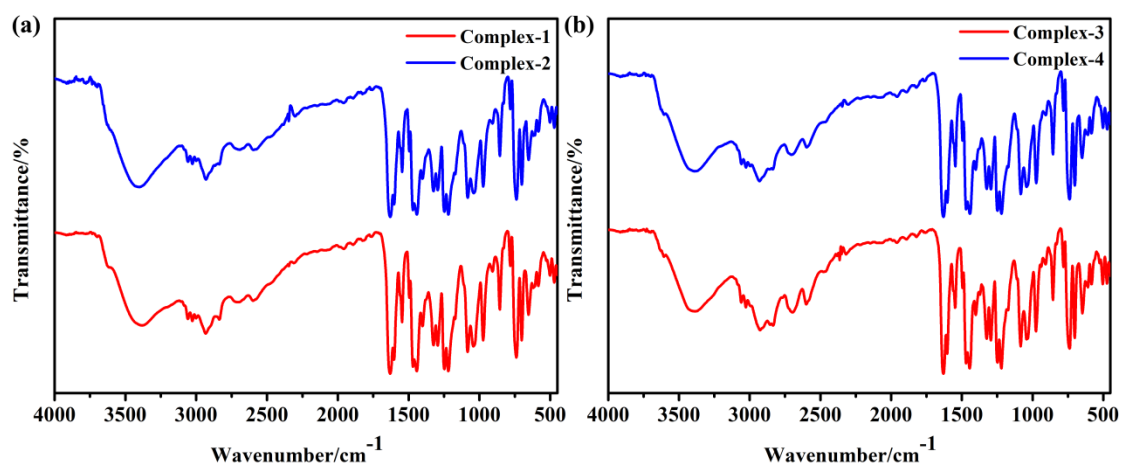

Fig. S1 The FT-IR spectra of complex 1-4.

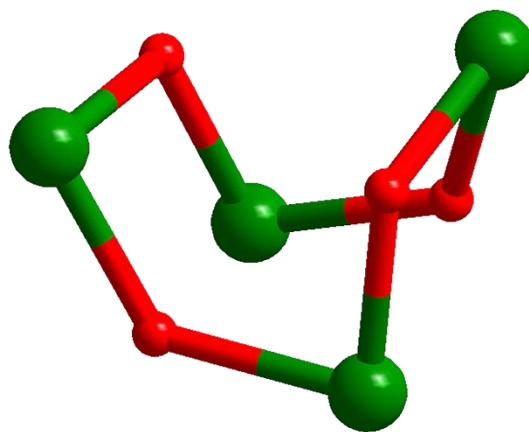

Fig. S2  $[\text{Cu}_4\text{O}_4]$  boated-shape structure.

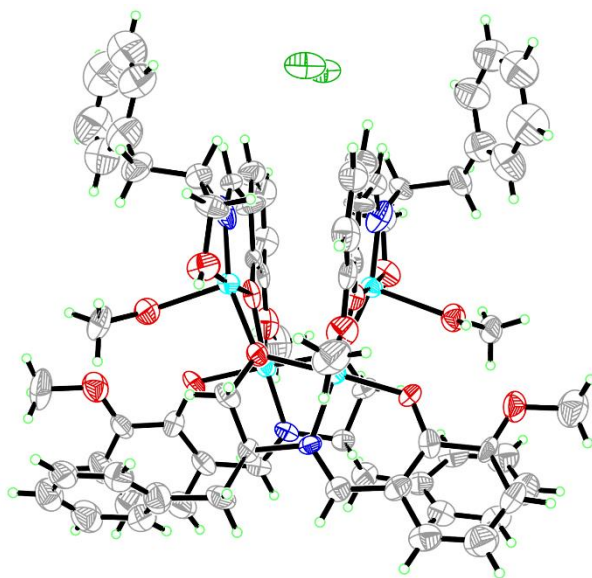

Fig. S3 The ORTEP of complex 1.

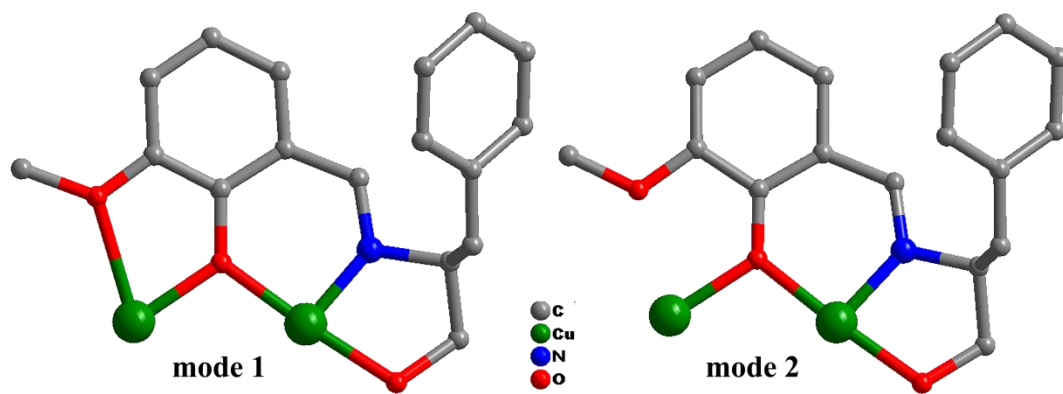

Fig. S4 The coordination mode of ligand  $L^{2-}$ .

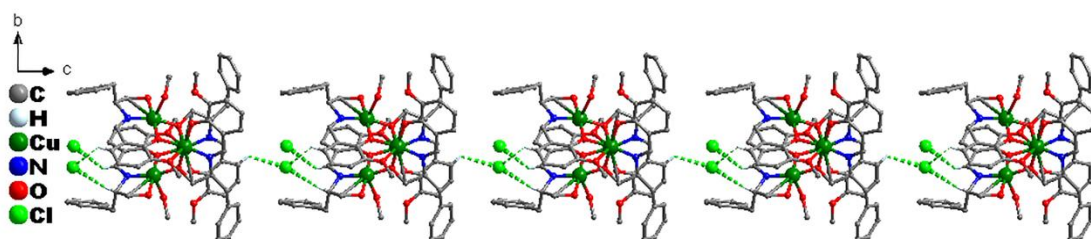

Fig. S5 A chain structure of complex 1 in the direction of  $a$  axis.

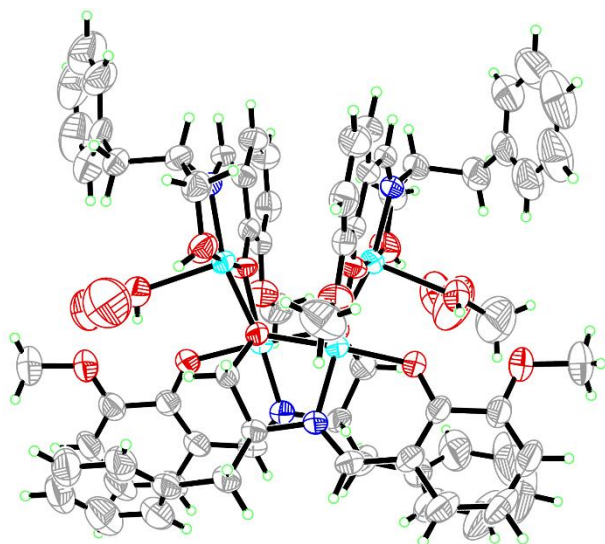

Fig. S6 The ORTEP of complex **3**.

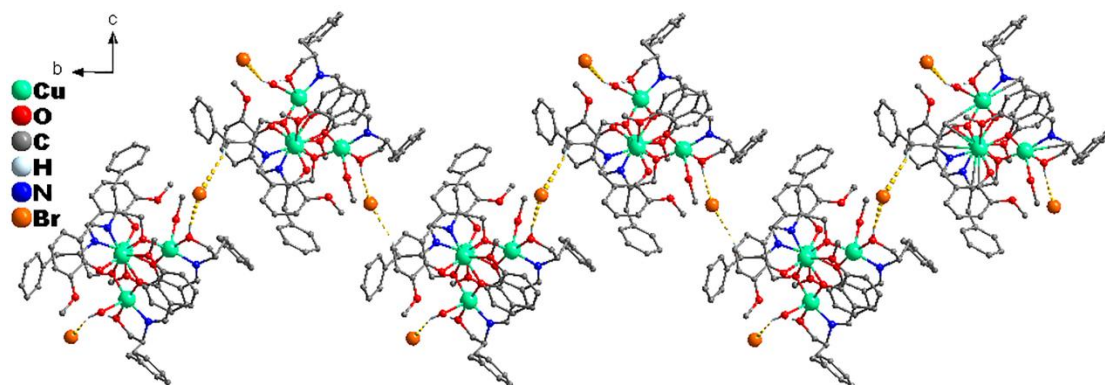

Fig. S7 A zig-zag chain structure of complex **3** in the direction of *a* axis.

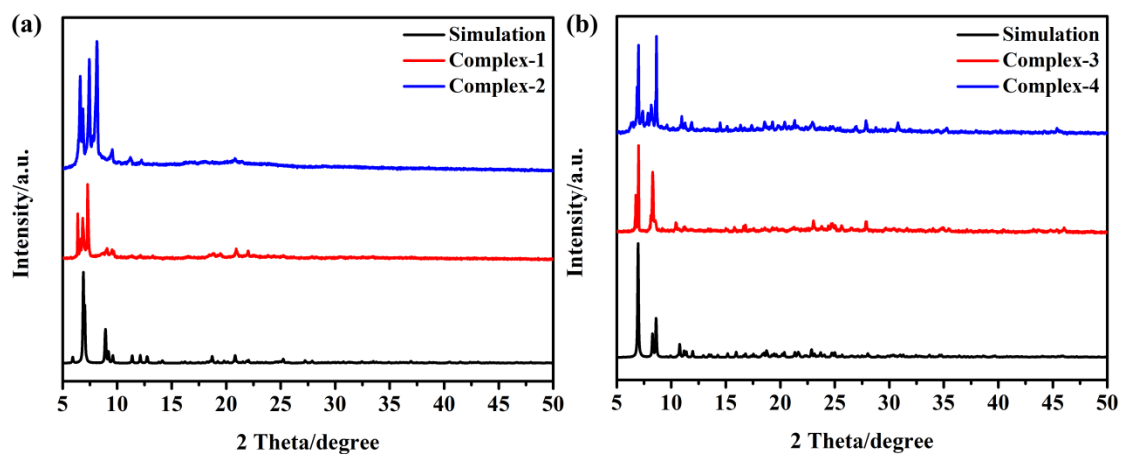

Fig. S8 The simulation and PXRD patterns for complex **1–4**.

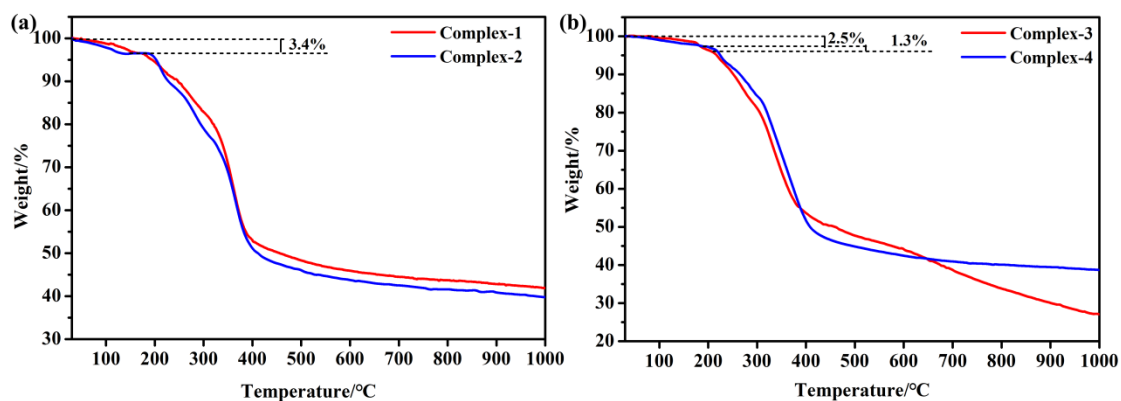

Fig. S9 (a) TGA curves of complex 1 and 2, (b) TGA curves complex 3 and 4.

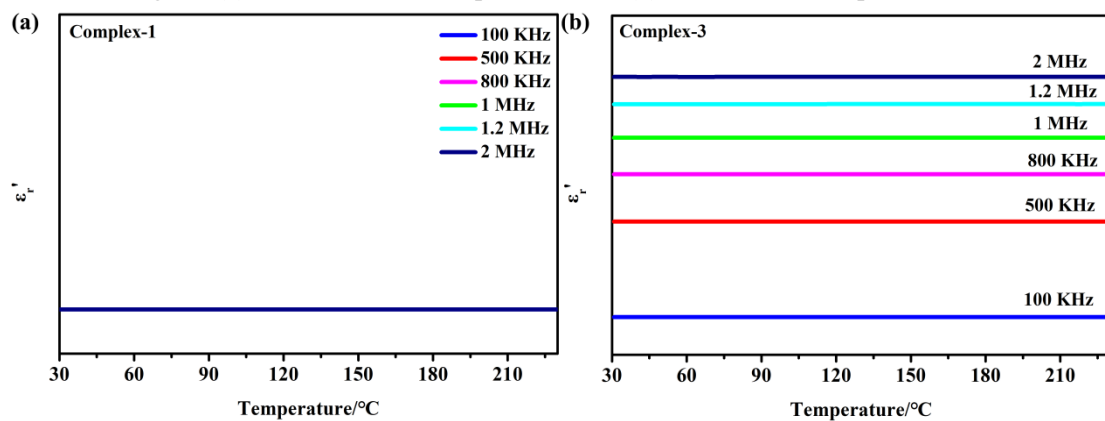

Fig. S10 Dielectric constant of complex 1 (a) and 3 (b) under different frequency in the temperature of 30–240°C.

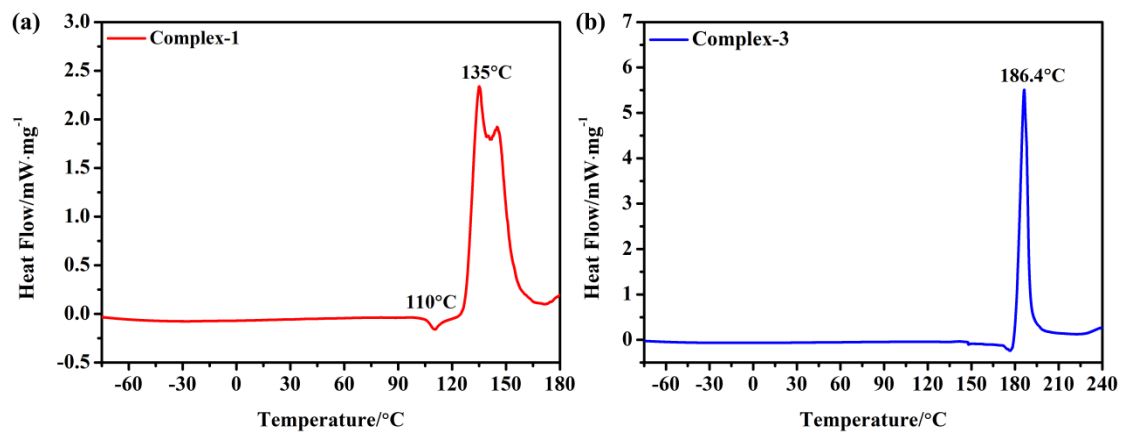

Fig. S11 DSC curves of complex 1 (a) and 3 (b).



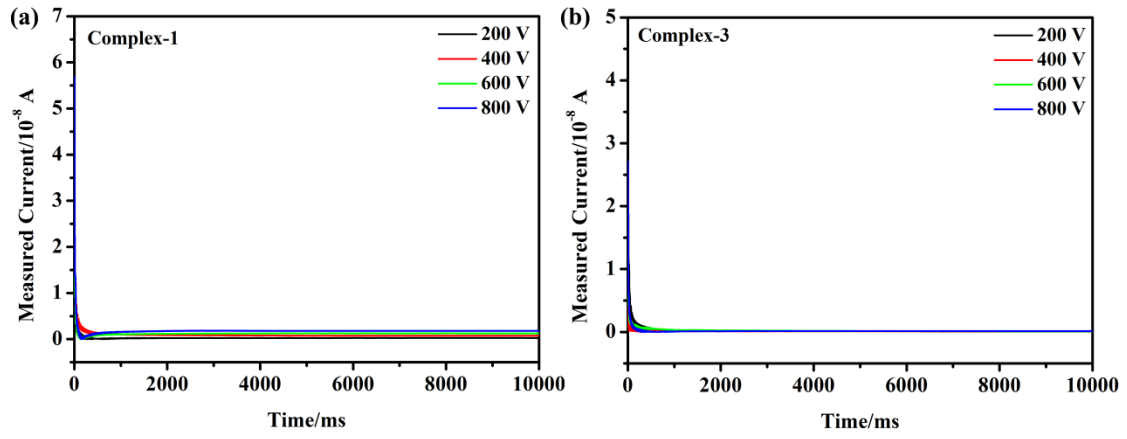

Fig. S12 Leakage curves of complex 1 (a) and 3 (b).
